# Supplementary material for: Development and Validation of a Risk Scoring Tool for Bronchopulmonary Dysplasia in Preterm Infants Based on a Systematic Review and Meta-Analysis
Source: MDPI journal article supplement (doi:10.3390/healthcare11050778), 2023-03-06
Supplement: s1 [file s1]

## **SUPPLEMENTARY Materials**

### **Development and validation of a risk scoring tool for bronchopulmonary dysplasia in preterm infants based on a systematic review and meta-analysis**

**Table S1.** Baseline characteristics of the 58 studies.

**Table S2.** Scoring results of Newcastle Ottawa quality assessment scale.

**Table S3.** Risk factors of the 58 studies.

**Table S4.** 24 risk factors include in the systematic review and meta-analysis.

**Table S5.** Publication bias of risk factors for BPD.

**Table S6.** Baseline characteristics of preterm infants in validation cohort.

**Table S7:** A predictive scoring system for BPD in preterm infants.

**Table S8:** The sensitivity, specificity and Youden index of different cutoff risk scores.

**Figure S1:** Forest plot: effect of CA on BPD in preterm infants.

**Figure S2:** Forest plot: effect of GA on BPD in preterm infants.

**Figure S3:** Forest plot: effect of BW on BPD in preterm infants.

**Figure S4:** Forest plot: effect of Sex (male) on BPD in preterm infants.

**Figure S5:** Forest plot: effect of SGA on BPD in preterm infants.

**Figure S6:** Forest plot: effect of 5 min Apgar score on BPD in preterm infants.

**Figure S7:** Forest plot: effect of DRI on BPD in preterm infants.

**Figure S8:** Forest plot: effect of Surfactant on BPD in preterm infants.

**Figure S9:** Forest plot: effect of RDS on BPD in preterm infants.

This supplementary material has been provided by the authors to give readers additional information about their work.

**Table S1. Baseline characteristics of the 58 studies**

| First author,<br>Year                  | Country<br>(centers)          | Research time                                                   | Prospective /<br>Retrospective | Cohort<br>/ Case-<br>control | BW (g) &<br>GA (weeks)<br>Mean $\pm$ SD /<br>Median (IQR) | Case /<br>Control<br>group | Definition<br>BPD       | NOS<br>Score |
|----------------------------------------|-------------------------------|-----------------------------------------------------------------|--------------------------------|------------------------------|-----------------------------------------------------------|----------------------------|-------------------------|--------------|
| Abele-Horn<br>1998                     | Germany(3)                    | 1993.01 - 1994.12                                               | Prospective                    | Cohort                       | 934.05 $\pm$ 260.7 &<br>27 $\pm$ 1.8                      | 48/49                      | BPD28 & Chest<br>X-rays | 9            |
| Hannaford 1999                         | Australia(2)                  | 1993.10 - 1994.10 &<br>1995.01 - 1996.11 &<br>1996.02 - 1997.06 | Prospective                    | Cohort                       | 832.2 $\pm$ 175.7 &<br>25.8 $\pm$ 1.1                     | 38/105                     | BPD36                   | 9            |
| Korhonen 1999                          | Finland(1)                    | 1990 - 1994                                                     | Retrospective                  | Cohort                       | 1125.4 $\pm$ 242.1 &<br>28.4 $\pm$ 2.2                    | 59/133                     | BPD28                   | 8            |
| Marshall 1999                          | USA(13)                       | 1994.01.01 - 1994.12.31                                         | Prospective                    | Cohort                       | 1100.1 $\pm$ 252.9 &<br>228.9 $\pm$ 2.6                   | 224/641                    | BPD36                   | 9            |
| Grupo<br>Colaborativo<br>Neocosur 2002 | South<br>American(11)         | 1997.10 - 1998.8                                                | Prospective                    | Cohort                       | 1129 $\pm$ 226 &<br>29.6 $\pm$ 3.4                        | 89/296                     | BPD28                   | 8            |
| Redline 2002                           | USA(1)                        | 1995 - 1997                                                     | Retrospective                  | Cohort                       | 1023.1 $\pm$ 268.7&<br>27.6 $\pm$ 2.67                    | 112/259                    | BPD36                   | 9            |
| Reiss 2003                             | Germany(NA)                   | 1990.01 - 1996.12                                               | Retrospective                  | Cohort                       | 1196.4 $\pm$ 367.3 &<br>28.8 $\pm$ 2.1                    | 185/1010                   | BPD28                   | 8            |
| Antonucci 2004                         | Italy(1)                      | 1993.01 - 1999.02                                               | Retrospective                  | Case-<br>control             | 1148 $\pm$ 226 &<br>30.1 $\pm$ 2.7                        | 141/136                    | BPD28 & Chest<br>X-rays | 8            |
| Choi 2005                              | South<br>Korea(1)             | 1995.1 - 2000.12                                                | Prospective                    | Cohort                       | 1168 $\pm$ 202 &<br>29.9 $\pm$ 2.2                        | 42/73                      | BPD28 &<br>BPD36        | 8            |
| Hentschel 2005                         | Switzerland(9)                | 1996 & 2000                                                     | Prospective                    | Cohort                       | 1084.85 $\pm$ NA &<br>29.25 $\pm$ NA                      | 100&84/<br>550&552         | BPD36                   | 8            |
| Tai 2005                               | China<br>Taiwan(8)            | 1996.01.01 - 2000.12.31                                         | Retrospective                  | Cohort                       | 1173.7 $\pm$ 226 &<br>29.4 $\pm$ 2.9                      | 538/1225                   | BPD36                   | 8            |
| Henderson-<br>Smart 2006               | Australia& New<br>Zealand(25) | 1998 - 2001                                                     | Prospective                    | Cohort                       | 1235(960 - 1510) &<br>29(27 - 30)                         | 2710/8743                  | BPD36                   | 8            |
| Tapia 2006                             | South<br>American(16)         | 2000.10 - 2003.12                                               | Prospective                    | Cohort                       | 1210 $\pm$ 243 &<br>30 $\pm$ 2.6                          | 446/1379                   | BPD28                   | 8            |
| Ameenudeen<br>2007                     | Malaysia(1)                   | 2003.04.01 - 2005.8.31                                          | Prospective                    | Cohort                       | 1141 $\pm$ 237 &<br>29.7 $\pm$ 2.7                        | 36/208                     | BPD36& Chest<br>X-rays  | 9            |
| Bhering 2007                           | Brazil(1)                     | 1998.01 - 2001.07<br>& 2001.08 - 2003.07                        | Retrospective<br>& Prospective | Cohort                       | 1083 $\pm$ 237 &<br>29.1 $\pm$ 2.4                        | 68/179                     | BPD28                   | 8            |
| Honma 2007                             | Japan(1)                      | 1997.11 - 2001.08                                               | Retrospective                  | Cohort                       | 1143 $\pm$ 326 &<br>28.7 $\pm$ 1.99                       | 39/66                      | BPD28                   | 7            |
| Demirel 2009                           | Turkey(1)                     | 2004.01 - 2006.12                                               | Retrospective                  | Case-<br>control             | 1214.48 $\pm$ 214.97 &<br>29.46 $\pm$ 2.14                | 56/50                      | BPD36                   | 8            |
| Guimarães 2010                         | Portugal(5)                   | 2004.01.01 - 2006.12.31                                         | Prospective                    | Cohort                       | 1116.9 $\pm$ 165.4 &<br>29.0 $\pm$ 1.2                    | 33/223                     | BPD36& Chest<br>X-rays  | 8            |
| Gantar 2011                            | Slovenia(1)                   | 2000.09.01 - 2002.6.30                                          | Prospective                    | Cohort                       | 1034 $\pm$ 236 &                                          | 25/90                      | BPD36                   | 8            |

|                |                     |                                          |                                |              |                                    |            |                  |   |
|----------------|---------------------|------------------------------------------|--------------------------------|--------------|------------------------------------|------------|------------------|---|
|                |                     |                                          |                                |              | 27.2 ± 1.5                         |            |                  |   |
|                |                     |                                          |                                |              | 1250(370 - 3150) &                 |            |                  |   |
| Gortner 2011   | Europe(NA)          | 2003                                     | Prospective                    | Cohort       | 30(23 - 31)                        | 677/3508   | BPD36            | 8 |
|                |                     |                                          |                                |              | <b>Median (range)</b>              |            |                  |   |
|                |                     |                                          |                                |              | 1120(410 - 1499) &                 |            |                  |   |
| Gagliardi 2011 | Italy(14)           | 1999 - 2002                              | Prospective                    | Cohort       | 29(23 - 31)                        | 196/1064   | BPD36            | 9 |
|                |                     |                                          |                                |              | <b>Median (range)</b>              |            |                  |   |
| Zhang 2011     | China(1)            | 1999.01 - 2009.01                        | Retrospective                  | Case-control | 1248 ± 195 &<br>30.20 ± 2.17       | 56/60      | BPD28            | 8 |
| Löfqvist 2012  | Sweden(2)           | 1999.12 - 2002.04<br>& 2005.01 - 2007.05 | Retrospective                  | Cohort       | 991 ± 337 &<br>27.2 ± 2.2          | 50/58      | BPD36            | 8 |
| O'Shea 2012    | Australia(NA)       | 1991 - 1992 & 1997 & 2005                | Prospective                    | Cohort       | 862 ± 170 &<br>26.6 ± 2.1          | 332/419    | BPD36            | 9 |
| Rojas 2012     | Colombia(8)         | 2004.01.01 - 2006.12.31                  | Prospective                    | Case-control | 1271.2 ± 283.3 &<br>29.2 ± 1.3     | 64/148     | BPD36            | 8 |
| Klinger 2013   | Israel(28)          | 2000 - 2010                              | Prospective                    | Cohort       | NA                                 | 1663/10476 | BPD36            | 8 |
| Shima 2013     | Japan(1)            | 2000.01 - 2009.12                        | Retrospective                  | Cohort       | 1236 ± 323 &<br>29.0 ± 1.3         | 53/253     | BPD36            | 8 |
| Yen 2013       | China<br>Taiwan(21) | 1997 - 2006                              | Retrospective                  | Cohort       | 1183.5 ± 276.8 &<br>29.3 ± 3.1     | 2008/3745  | BPD36            | 9 |
| AlShehri 2014  | Saudi<br>Arabia(1)  | 2002.01 - 2011.12                        | Retrospective                  | Cohort       | 1078 ± 176 &<br>29.3 ± 1.8         | 266/676    | BPD28 &<br>BPD36 | 8 |
| Gursoy 2015    | Turkey(1)           | 2006 - 2009                              | Retrospective                  | Cohort       | 1218 ± 220 &<br>29.4 ± 1.9         | 150/502    | BPD28            | 8 |
| Novitsky 2015  | USA(1)              | 2004.07 - 2009.06                        | Retrospective                  | Cohort       | 1056 ± 285 &<br>28.1 ± 3.5         | 182/724    | BPD36            | 8 |
| Sasi 2015      | Australia(1)        | 2002 - 2012                              | Retrospective                  | Cohort       | 1116.7 ± 371.3 &<br>28.7 ± 1.8     | 123/336    | BPD36            | 9 |
|                |                     |                                          |                                |              | 1418 ± 297 &                       |            |                  |   |
| Duan 2016      | China(1)            | 2014.02 - 2015.02                        | Prospective                    | Cohort       | 29 (25 - 31)                       | 71/172     | BPD28 &<br>BPD36 | 9 |
|                |                     |                                          |                                |              | <b>Median (range)</b>              |            |                  |   |
| Fonseca 2017   | Brazil(1)           | 2011.01 - 2014.10                        | Prospective &<br>Retrospective | Cohort       | 1200.8 ± 264.3 &<br>30.1 ± 2.3     | 94/229     | BPD28            | 8 |
| Lio 2017       | Italy(1)            | 2009.01 - 2013.06                        | Prospective                    | Cohort       | 909 ± 243 &<br>27.1 ± 1.5          | 20/134     | BPD36            | 8 |
| Soliman 2017   | Canada(1)           | 2007.01 - 2010.06                        | Prospective                    | Cohort       | 1186.9 ± 398.8 &<br>28.8 ± 2.0     | 79/240     | BPD36            | 8 |
| Jung 2019      | South<br>Korea(64)  | 2013.01.01 - 2015.12.31                  | Prospective                    | Cohort       | 790.4 ± 143.6 &<br>26.2 ± 1.6      | 816/618    | BPD36            | 9 |
| Mahallei 2019  | Iran(1)             | 2017.03 - 2018.03                        | Prospective                    | Cohort       | 1100.66 ± 216.65 &<br>28.56 ± 1.95 | 33/28      | BPD28            | 8 |
| Malikiwi 2019  | Australia(1)        | 2011.01 - 2013.12                        | Retrospective                  | Case-control | 789.8 ± 122.8 &<br>26 ± 1.2        | 33/33      | BPD36            | 8 |
| Patel 2019     | USA(3)              | 2010.01 - 2013.06                        | Retrospective                  | Cohort       | 1024 (790 - 1233) &                | 240/358    | BPD28 &          | 9 |

|                          |                    |                         |               |                  |                                                 |           |                  |   |
|--------------------------|--------------------|-------------------------|---------------|------------------|-------------------------------------------------|-----------|------------------|---|
|                          |                    |                         |               |                  | 28 (26 - 30)                                    |           | BPD36            |   |
| Rocha 2019               | Portugal(11)       | 2015.01.01 - 2016.12.31 | Prospective   | Cohort           | 963 ± 256 &<br>27.6 ± 10.3                      | 119/375   | BPD36            | 8 |
| Ryan 2019                | USA(11)            | 2011 - 2013             | Prospective   | Cohort           | 913.6 ± 233.4 &<br>26.7 ± 1.4                   | 298/409   | BPD36            | 8 |
| Tagliaferro 2019         | USA(1)             | 2005.01 - 2015.12       | Prospective   | Cohort           | 809.2 ± 231.2 &<br>25.7 ± 1.6                   | 354/679   | BPD36            | 8 |
| Zhou 2019                | China(1)           | 2011 - 2014             | Prospective   | Cohort           | 1380.3 ± 249.4 &<br>30.43 ± 1.44                | 22/104    | BPD28 &<br>BPD36 | 8 |
| Chen 2020                | China(1)           | 2016.01 - 2018.07       | Retrospective | Cohort           | 910 ± 199.25 &<br>26.4 ± 1.5                    | 62/141    | BPD36            | 8 |
| Cokyaman 2020            | Turkey(1)          | 2006.01.01 - 2008.12.31 | Retrospective | Cohort           | 1212 ± 211 &<br>31.1 ± 2.6                      | 139/551   | BPD28            | 8 |
| Shin 2020                | South<br>Korea(NA) | 2013.01 - 2014.12       | Retrospective | Cohort           | 1010.6 ± 255.9 &<br>27.3 ± 1.8                  | 764/1603  | BPD36            | 9 |
| Cai 2021                 | China(1)           | 2017.01 - 2019.09       | Retrospective | Case-<br>control | 1209.6 ± 199.7 &<br>29.95 ± 2.15                | 63/388    | BPD28            | 8 |
| Ebrahimi 2021            | Netherland(1)      | 2009.01 - 2015.12       | Retrospective | Cohort           | 936.9 ± 248.3 &<br>27.2 ± 2.0                   | 79/130    | BPD28            | 8 |
| EI Faleh 2021            | Switzerland(9)     | 2009.01.01 - 2010.12.31 | Prospective   | Cohort           | 1230.7 ± 337.7 &<br>29.6 ± 1.8                  | 138/1087  | BPD36            | 8 |
| Jassem-<br>Bobowicz 2021 | Switzerland(1)     | 2013.01 - 2017.03       | Retrospective | Cohort           | 1214.9 ± NA &<br>29.0 ± NA                      | 127/151   | BPD28            | 8 |
| Li 2021                  | China(33)          | 2017 - 2018             | Retrospective | Cohort           | 938 ± 162 &<br>27.7 ± 1.8                       | 181/446   | BPD36            | 7 |
| Lu 2021                  | China(1)           | 2018.01 - 2020.12       | Retrospective | Case-<br>control | 1241.8 ± 161.5 &<br>29.9 ± 1.9                  | 79/207    | BPD28            | 8 |
| Ming 2021                | China(1)           | 2018.08.01 - 2020.08.31 | Retrospective | Case-<br>control | 1460 (1231.3,<br>1687.5) & 30.7<br>(29.6, 31.4) | 135/229   | BPD36            | 9 |
| Nakashima 2021           | Japan(218)         | 2003.01.01 - 2016.12.31 | Retrospective | Cohort           | 746 (604 - 907) &<br>25.9 (24.4 - 27.0)         | 7792/9334 | BPD28 &<br>BPD36 | 8 |
| Shim 2021                | South<br>Korea(NA) | 2013.01.01 - 2016.12.31 | Retrospective | Cohort           | 1118.5 ± 263.7 &<br>28.67 ± 2.6                 | 2583/2017 | BPD36            | 8 |
| Sucasas Alonso<br>2022   | Spain(1)           | 2013.01.01 - 2020.08.30 | Retrospective | Cohort           | 1142.1 ± 255.5 &<br>29.5 ± 2.1                  | 58/144    | BPD28 & BPD36    | 8 |
| Wang 2022                | China(1)           | 2015.01.01 - 2019.08.31 | Retrospective | Case-<br>control | 1227.4 ± 199.6 &<br>28.3 ± 2.9                  | 64/70     | BPD28            | 9 |

Note: NA, not available; GA, gestational age; BW, birth weight; Mean ± SD, Mean ± standard deviation; IQR, interquartile range; BPD, bronchopulmonary dysplasia; BPD28, bronchopulmonary dysplasia defined as oxygen dependency at 28 days of life; BPD36, bronchopulmonary dysplasia defined as oxygen dependency at 36 weeks postmenstrual age; Chest X-rays, characteristic chest radiographic findings.

Table S2. Scoring results of Newcastle Ottawa quality assessment scale

| First author, year   | Selection | Comparability | Outcome | Total scores | Reasons for downgrade                                                                              |
|----------------------|-----------|---------------|---------|--------------|----------------------------------------------------------------------------------------------------|
| Abele-Horn 1998      | ****      | **            | ***     | 9            |                                                                                                    |
| Hannaford 1999       | ****      | **            | ***     | 9            |                                                                                                    |
| Korhonen 1999        | ****      | *             | ***     | 8            | No adjustment for confounders                                                                      |
| Marshall 1999        | ****      | **            | ***     | 9            |                                                                                                    |
| Grupo Colaborativo   | ****      | *             | ***     | 8            | No adjustment for confounders                                                                      |
| Neocosur 2002        |           |               |         |              |                                                                                                    |
| Redline 2002         | ****      | **            | ***     | 9            |                                                                                                    |
| Reiss 2003           | ****      | *             | ***     | 8            | No adjustment for confounders                                                                      |
| Antonucci 2004       | ****      | *             | ***     | 8            | No adjustment for confounders                                                                      |
| Choi 2005            | ****      | *             | ***     | 8            | No adjustment for confounders                                                                      |
| Hentschel 2005       | ****      | *             | ***     | 8            | No adjustment for confounders                                                                      |
| Tai 2005             | ****      | *             | ***     | 8            | No adjustment for confounders                                                                      |
| Henderson-Smart 2006 | ****      | *             | ***     | 8            | No adjustment for confounders                                                                      |
| Tapia 2006           | ****      | *             | ***     | 8            | No adjustment for confounders                                                                      |
| Ameenudeen 2007      | ****      | **            | ***     | 9            |                                                                                                    |
| Bhering 2007         | ****      | *             | ***     | 8            | No adjustment for confounders                                                                      |
| Honma 2007           | ***       | *             | ***     | 7            | Non-representative population (All multiple-birth infants excluded), No adjustment for confounders |
| Demirel 2009         | ****      | *             | ***     | 8            | No adjustment for confounders                                                                      |
| Guimarães 2010       | ****      | *             | ***     | 8            | No adjustment for confounders                                                                      |
| Gantar 2011          | ****      | *             | ***     | 8            | No adjustment for confounders                                                                      |
| Gortner 2011         | ****      | *             | ***     | 8            | No adjustment for confounders                                                                      |
| Gagliardi 2011       | ****      | **            | ***     | 9            |                                                                                                    |
| Zhang 2011           | ****      | *             | ***     | 8            | No adjustment for confounders                                                                      |
| Löfqvist 2012        | ****      | *             | ***     | 8            | No adjustment for confounders                                                                      |
| O'Shea 2012          | ****      | **            | ***     | 9            |                                                                                                    |
| Rojas 2012           | ****      | *             | ***     | 8            | No adjustment for confounders                                                                      |
| Klinger 2013         | ****      | *             | ***     | 8            | No adjustment for confounders                                                                      |
| Shima 2013           | ****      | *             | ***     | 8            | No adjustment for confounders                                                                      |
| Yen 2013             | ****      | **            | ***     | 9            |                                                                                                    |
| AlShehri 2014        | ****      | *             | ***     | 8            | No adjustment for confounders                                                                      |
| Gursoy 2015          | ****      | *             | ***     | 8            | No adjustment for confounders                                                                      |
| Novitsky 2015        | ****      | *             | ***     | 8            | No adjustment for confounders                                                                      |
| Sasi 2015            | ****      | **            | ***     | 9            |                                                                                                    |
| Duan 2016            | ****      | **            | ***     | 9            |                                                                                                    |
| Fonseca 2017         | ****      | *             | ***     | 8            | No adjustment for confounders                                                                      |
| Lio 2017             | ***       | *             | ***     | 8            | No adjustment for confounders                                                                      |
| Soliman 2017         | ***       | *             | ***     | 8            | No adjustment for confounders                                                                      |

|                      |         |     |       |   |                                                                                |
|----------------------|---------|-----|-------|---|--------------------------------------------------------------------------------|
| Jung 2019            | * * * * | * * | * * * | 9 |                                                                                |
| Mahallei 2019        | * * *   | * * | * * * | 8 | Non-representative population (all infants intubated)                          |
| Malikiwi 2019        | * * * * | *   | * * * | 8 | No adjustment for confounders                                                  |
| Patel 2019           | * * * * | * * | * * * | 9 |                                                                                |
| Rocha 2019           | * * * * | *   | * * * | 8 | No adjustment for confounders                                                  |
| Ryan 2019            | * * *   | *   | * * * | 8 | No adjustment for confounders                                                  |
| Tagliaferro 2019     | * * * * | *   | * * * | 8 | No adjustment for confounders                                                  |
| Zhou 2019            | * * * * | *   | * * * | 8 | No adjustment for confounders                                                  |
| Chen 2020            | * * * * | *   | * * * | 8 | No adjustment for confounders                                                  |
| Cokyaman 2020        | * * * * | *   | * * * | 8 | No adjustment for confounders                                                  |
| Shin 2020            | * * * * | * * | * * * | 9 |                                                                                |
| Cai 2021             | * * * * | *   | * * * | 8 | No adjustment for confounders                                                  |
| Ebrahimi 2021        | * * *   | * * | * * * | 8 | Non-representative population (all infants with one or more late-onset sepsis) |
| El Faleh 2021        | * * * * | *   | * * * | 8 | No adjustment for confounders                                                  |
| Jassem-Bobowicz 2021 | * * * * | *   | * * * | 8 | No adjustment for confounders                                                  |
| Li 2021              | * * * * | *   | * *   | 7 | No adjustment for confounders; Loss to follow-up                               |
| Lu 2021              | * * * * | *   | * * * | 8 | No adjustment for confounders                                                  |
| Ming 2021            | * * * * | * * | * * * | 9 |                                                                                |
| Nakashima 2021       | * * * * | *   | * * * | 8 | No adjustment for confounders                                                  |
| Shim 2021            | * * * * | *   | * * * | 8 | No adjustment for confounders                                                  |
| Sucasas Alonso 2022  | * * * * | *   | * * * | 8 | No adjustment for confounders                                                  |
| Wang 2022            | * * * * | * * | * * * | 9 |                                                                                |

Table S3. Risk factors of the 58 studies

| First author, year                  | MHD | CA | Antenatal steroids | PROM | GA | BW | Sex (male) | SGA | Caesarean section | 5 min Apgar score | DRI | Neonatal asphyxia | MV | Days of MV | MV > 7 days | Postnatal steroids | Surfactant | PDA | RDS | ROP | Sepsis | IVH | NEC | Pulmonary air leak |
|-------------------------------------|-----|----|--------------------|------|----|----|------------|-----|-------------------|-------------------|-----|-------------------|----|------------|-------------|--------------------|------------|-----|-----|-----|--------|-----|-----|--------------------|
| Abele-Horn 1998                     |     | •  |                    |      | •  | •  |            | •   |                   |                   |     |                   |    | •          |             | •                  | •          | •   | •   |     | •      |     |     |                    |
| Hannaford 1999                      |     |    |                    |      | •  |    |            |     |                   |                   |     |                   |    |            |             |                    |            |     |     |     |        |     |     |                    |
| Korhonen 1999                       |     |    |                    |      |    |    | •          | •   |                   |                   |     |                   |    |            |             |                    |            |     |     |     |        |     |     |                    |
| Marshall 1999                       |     |    |                    |      |    | •  |            |     |                   |                   |     |                   |    |            |             |                    | •          |     |     |     |        |     |     |                    |
| Grupo Colaborativo<br>Neocosur 2002 |     |    |                    |      | •  | •  |            |     |                   |                   |     |                   |    |            |             |                    | •          |     |     |     |        |     | •   |                    |
| Redline 2002                        |     |    |                    |      | •  |    |            |     |                   |                   |     |                   |    |            |             |                    |            | •   |     |     |        |     |     | •                  |
| Reiss 2003                          |     |    |                    |      | •  |    | •          | •   |                   |                   |     |                   |    | •          |             | •                  |            |     |     |     | •      |     |     |                    |
| Antonucci 2004                      |     |    |                    |      |    |    |            |     |                   |                   |     |                   |    | •          |             |                    |            | •   | •   |     |        |     |     |                    |
| Choi 2005                           |     | •  |                    |      | •  |    | •          |     |                   | •                 |     |                   |    |            |             |                    |            | •   | •   |     | •      |     |     | •                  |
| Hentschel 2005                      |     |    |                    |      |    |    |            |     |                   |                   |     |                   | •  |            |             |                    | •          | •   |     |     |        |     |     |                    |
| Tai 2005                            |     |    |                    |      | •  | •  |            |     | •                 |                   |     |                   |    |            |             |                    |            | •   |     |     | •      |     |     |                    |
| Henderson-Smart<br>2006             |     |    |                    |      |    |    | •          |     |                   |                   |     |                   |    |            |             |                    |            |     |     |     |        |     |     |                    |
| Tapia 2006                          |     |    |                    |      | •  | •  | •          |     |                   |                   |     |                   |    |            |             |                    | •          | •   |     |     |        |     | •   | •                  |
| Ameenudeen 2007                     |     | •  |                    |      |    |    | •          |     |                   |                   |     |                   |    |            |             |                    |            | •   |     |     |        |     |     |                    |
| Bhering 2007                        | •   |    |                    |      |    |    |            |     | •                 |                   | •   |                   |    |            |             |                    |            | •   | •   |     |        |     |     |                    |
| Honma 2007                          |     | •  |                    | •    | •  | •  |            |     |                   |                   |     |                   |    |            |             |                    |            |     |     |     |        |     |     |                    |
| Demirel 2009                        |     |    |                    |      |    |    |            |     |                   |                   |     |                   | •  |            |             |                    | •          |     | •   |     |        |     |     |                    |
| Guimarães 2010                      |     |    |                    |      |    | •  |            |     |                   |                   |     |                   |    |            |             |                    |            |     |     |     | •      |     |     |                    |
| Gantar 2011                         |     |    |                    |      |    |    | •          |     |                   |                   | •   |                   |    |            |             |                    | •          | •   |     |     |        |     |     | •                  |
| Gortner 2011                        | •   |    |                    |      |    |    | •          | •   |                   |                   |     |                   |    |            |             |                    |            |     |     |     |        |     |     |                    |
| Gagliardi 2011                      |     |    |                    |      |    |    | •          | •   |                   |                   |     |                   |    | •          |             |                    |            |     |     |     |        |     |     |                    |
| Zhang 2011                          |     | •  |                    |      |    |    |            |     |                   |                   |     |                   |    |            |             |                    |            |     |     |     |        |     |     |                    |
| Löfqvist 2012                       |     |    |                    |      | •  | •  | •          |     |                   | •                 |     |                   | •  | •          |             | •                  | •          |     |     | •   |        | •   |     |                    |
| O'Shea 2012                         |     |    |                    |      | •  | •  | •          |     |                   |                   |     |                   |    |            |             |                    |            |     |     |     |        |     |     |                    |





---

|                     |   |   |   |   |   |   |     |   |
|---------------------|---|---|---|---|---|---|-----|---|
| Nakashima 2021      | • |   | • | • |   |   | •   | • |
| Shim 2021           | • | • | • | • |   |   | •   |   |
| Sucasas Alonso 2022 |   |   |   |   | • |   | • • | • |
| Wang 2022           |   |   | • |   |   | • |     |   |

---

Note: MHD, maternal hypertensive disorders; CA, Chorioamnionitis; PROM, premature rupture of membrane; GA, gestational age; BW, birth weight; SGA, small for gestational age; DRI, delivery room intubation; MV, mechanical ventilation; PDA, patent ductus arteriosus; RDS, respiratory distress syndrome; ROP, retinopathy of prematurity; IVH, intraventricular hemorrhage; NEC, necrotizing enterocolitis.

**Table S4. 24 risk factors include in the systematic review and meta-analysis**

| Meta-analysis      | No. of Studies | OR    | 95% CI        | <i>p</i> Value | Heterogeneity<br><i>I</i> <sup>2</sup> , % | <i>p</i> Value |
|--------------------|----------------|-------|---------------|----------------|--------------------------------------------|----------------|
| MHD                | 7              | 1.09  | [0.76,1.58]   | 0.634          | 84.2                                       | 0.000          |
| CA                 | 9              | 2.82  | [1.92,4.15]   | 0.000          | 82.8                                       | 0.000          |
| Antenatal steroids | 3              | 0.76  | [0.39,1.49]   | 0.428          | 88.5                                       | 0.000          |
| PROM               | 4              | 1.32  | [0.67,2.59]   | 0.418          | 87.1                                       | 0.000          |
| GA                 | 21             | 0.64  | [0.58,0.70]   | 0.000          | 95.1                                       | 0.000          |
| BW                 | 12             | 0.80  | [0.77,0.83]   | 0.000          | 55.1                                       | 0.011          |
| Sex (male)         | 21             | 1.50  | [1.38,1.63]   | 0.000          | 47.6                                       | 0.009          |
| SGA                | 11             | 2.90  | [1.94,4.35]   | 0.000          | 93.9                                       | 0.000          |
| Caesarean section  | 4              | 1.00  | [0.47,2.12]   | 0.990          | 86.4                                       | 0.000          |
| 5 min Apgar score  | 5              | 0.71  | [0.64,0.78]   | 0.000          | 0                                          | 0.524          |
| DRI                | 8              | 2.66  | [2.02,3.50]   | 0.000          | 66.3                                       | 0.004          |
| Neonatal asphyxia  | 3              | 2.08  | [1.42,3.04]   | 0.000          | 0                                          | 0.488          |
| MV                 | 7              | 3.28  | [2.14,5.03]   | 0.000          | 63.9                                       | 0.011          |
| Days of MV         | 4              | 1.10  | [1.08,1.12]   | 0.000          | 23.1                                       | 0.272          |
| MV>7 days          | 3              | 19.50 | [10.82,35.14] | 0.000          | 0                                          | 0.404          |
| Postnatal steroids | 4              | 5.93  | [3.67,9.61]   | 0.000          | 45.5                                       | 0.138          |
| Surfactant         | 17             | 3.42  | [2.43,4.83]   | 0.000          | 86.3                                       | 0.000          |
| PDA                | 20             | 3.09  | [2.31,4.13]   | 0.000          | 90.4                                       | 0.000          |
| RDS                | 13             | 4.47  | [2.84,7.04]   | 0.000          | 95.1                                       | 0.000          |
| ROP                | 3              | 3.56  | [0.94,13.49]  | 0.061          | 92                                         | 0.000          |
| Sepsis             | 14             | 2.07  | [1.67,2.57]   | 0.000          | 83.4                                       | 0.000          |
| IVH                | 4              | 2.75  | [1.90,3.97]   | 0.000          | 0                                          | 0.544          |
| NEC                | 4              | 2.11  | [1.29,3.47]   | 0.000          | 78.0                                       | 0.003          |
| Pulmonary air leak | 4              | 3.15  | [1.25,7.92]   | 0.015          | 79.4                                       | 0.002          |

Note: OR, Odds ratio; CI, confidence interval; MHD, maternal hypertensive disorders; CA, Chorioamnionitis; PROM, premature rupture of membrane; GA, gestational age; BW, birth weight; SGA, small for gestational age; DRI, delivery room intubation; MV, mechanical ventilation; PDA, patent ductus arteriosus; RDS, respiratory distress syndrome; ROP, retinopathy of prematurity; IVH, intraventricular hemorrhage; NEC, necrotizing enterocolitis.

**Table S5: Publication bias of risk factors for BPD**

| Risk factors       | Begg's test |        | Egger's test |        |
|--------------------|-------------|--------|--------------|--------|
|                    | Z           | Pr> z  | t            | p      |
| CA                 | 2.19        | 0.029* | 8.39         | 0.000* |
| GA                 | 1.18        | 0.239  | -2.27        | 0.035* |
| BW                 | 1.30        | 0.193  | -1.38        | 0.199  |
| Sex (male)         | 3.11        | 0.002* | 2.40         | 0.027* |
| SGA                | 0.00        | 1.000  | 1.26         | 0.241  |
| 5 min Apgar score  | 0.24        | 0.806  | -1.34        | 0.273  |
| DRI                | 0.87        | 0.386  | 4.33         | 0.005* |
| Neonatal asphyxia  | 1.04        | 0.296  | 11.29        | 0.056  |
| MV                 | 1.80        | 0.072  | 4.75         | 0.005* |
| Days of MV         | 1.02        | 0.308  | 5.46         | 0.032* |
| MV>7 days          | 1.04        | 0.296  | 3.94         | 0.158  |
| Postnatal steroids | 1.70        | 0.089  | 3.98         | 0.058  |
| Surfactant         | 1.85        | 0.064  | 4.65         | 0.000* |
| PDA                | 2.17        | 0.030* | 5.74         | 0.000* |
| RDS                | 0.67        | 0.502  | 3.35         | 0.006* |
| Sepsis             | 1.97        | 0.049* | 5.27         | 0.000* |
| IVH                | 1.70        | 0.089  | 3.81         | 0.062  |
| NEC                | 1.70        | 0.089  | 8.74         | 0.013* |
| Pulmonary air leak | 1.02        | 0.308  | 12.57        | 0.006* |

Note: CA, Chorioamnionitis; GA, gestational age; BW, birth weight; SGA, small for gestational age; DRI, delivery room intubation; MV, mechanical ventilation; PDA, patent ductus arteriosus; RDS, respiratory distress syndrome; IVH, intraventricular hemorrhage; NEC, necrotizing enterocolitis.

\*,  $p < 0.05$ .

**Table S6: Baseline characteristics of preterm infants in validation cohort**

| Variables                 | Total<br>(N = 767) | BPD              |                  | <i>p</i><br>value |
|---------------------------|--------------------|------------------|------------------|-------------------|
|                           |                    | Yes(N = 185)     | No(N = 582)      |                   |
| MHD [n(%)]                |                    |                  |                  | 0.814             |
| Yes                       | 112(14.6)          | 28(15.1)         | 84(14.4)         |                   |
| No                        | 655(85.4)          | 157(84.9)        | 498(85.6)        |                   |
| CA [n(%)]                 |                    |                  |                  | 0.000             |
| Yes                       | 119(15.5)          | 69(37.3)         | 50(8.6)          |                   |
| No                        | 648(84.5)          | 116(62.7)        | 532(91.4)        |                   |
| Antenatal steroids [n(%)] |                    |                  |                  | 0.917             |
| Yes                       | 383(49.9)          | 93(50.3)         | 290(49.8)        |                   |
| No                        | 384(50.1)          | 92(49.7)         | 292(50.2)        |                   |
| PROM [n(%)]               |                    |                  |                  | 0.473             |
| Yes                       | 257(33.5)          | 66(35.7)         | 191(32.8)        |                   |
| No                        | 510(66.5)          | 119(64.3)        | 391(67.2)        |                   |
| GA (weeks)                | 30.14 ± 1.79       | 28.68 ± 1.74     | 30.60 ± 1.54     | 0.000             |
| BW (g)                    | 1306.04 ± 314.28   | 1053.06 ± 239.83 | 1386.46 ± 291.80 | 0.000             |
| Sex[n(%)]                 |                    |                  |                  | 0.003             |
| Male                      | 399(52.0)          | 114(61.6)        | 285(49.0)        |                   |
| Female                    | 368(48.0)          | 71(38.4)         | 297(51.0)        |                   |
| SGA[n(%)]                 |                    |                  |                  | 0.000             |
| Yes                       | 232(30.2)          | 83(44.9)         | 149(25.6)        |                   |
| No                        | 535(69.8)          | 102(55.1)        | 433(74.4)        |                   |
| Caesarean section [n(%)]  |                    |                  |                  | 0.000             |
| Yes                       | 543(70.8)          | 108(58.4)        | 435(74.7)        |                   |
| No                        | 224(29.2)          | 77(41.6)         | 147(25.3)        |                   |
| 5 min Apgar score         | 8.63 ± 1.89        | 6.50 ± 1.87      | 9.31 ± 1.30      | 0.000             |
| DRI [n(%)]                |                    |                  |                  | 0.000             |
| Yes                       | 190(24.8)          | 95(51.4)         | 95(16.3)         |                   |
| No                        | 577(75.2)          | 90(48.6)         | 487(83.7)        |                   |
| Neonatal asphyxia [n(%)]  |                    |                  |                  | 0.000             |
| Yes                       | 357(46.5)          | 128(69.2)        | 229(39.3)        |                   |
| No                        | 410(53.5)          | 57(30.8)         | 353(60.7)        |                   |
| Days of MV (days)         | 2.91 ± 7.26        | 7.77 ± 12.84     | 1.36 ± 2.73      | 0.000             |
| MV [n(%)]                 |                    |                  |                  | 0.000             |
| Yes                       | 290(37.8)          | 119(64.3)        | 171(29.4)        |                   |
| No                        | 477(62.2)          | 66(35.7)         | 411(70.6)        |                   |
| MV > 7 days               |                    |                  |                  | 0.000             |
| Yes                       | 89(11.6)           | 62(33.5)         | 27(4.6)          |                   |
| No                        | 678(88.4)          | 123(66.5)        | 555(95.4)        |                   |
| Postnatal steroids [n(%)] |                    |                  |                  | 0.000             |
| Yes                       | 153(19.9)          | 87(47.0)         | 66(11.3)         |                   |
| No                        | 614(80.1)          | 98(53.0)         | 516(88.7)        |                   |
| Surfactant [n(%)]         |                    |                  |                  | 0.000             |

|                          |           |           |           |       |
|--------------------------|-----------|-----------|-----------|-------|
| Yes                      | 334(43.5) | 126(68.1) | 208(35.7) |       |
| No                       | 433(56.5) | 59(31.9)  | 374(64.3) |       |
| PDA[n(%)]                |           |           |           | 0.000 |
| Yes                      | 141(18.4) | 64(34.6)  | 77(13.2)  |       |
| No                       | 626(81.6) | 121(65.4) | 505(86.8) |       |
| RDS[n(%)]                |           |           |           | 0.000 |
| Yes                      | 583(76.0) | 177(95.7) | 406(69.8) |       |
| No                       | 184(24.0) | 8(4.3)    | 176(30.2) |       |
| ROP[n(%)]                |           |           |           | 0.000 |
| Yes                      | 143(18.6) | 74(40.0)  | 69(11.9)  |       |
| No                       | 624(81.4) | 111(60.0) | 513(88.1) |       |
| Sepsis [n(%)]            |           |           |           | 0.000 |
| Yes                      | 215(28.0) | 78(42.2)  | 137(23.5) |       |
| No                       | 552(72.0) | 107(57.8) | 445(76.5) |       |
| IVH [n(%)]               |           |           |           | 0.385 |
| Yes                      | 14(1.8)   | 2(1.1)    | 12(2.1)   |       |
| No                       | 753(98.2) | 183(98.9) | 570(97.9) |       |
| NEC [n(%)]               |           |           |           | 0.625 |
| Yes                      | 56(7.3)   | 12(6.5)   | 44(7.6)   |       |
| No                       | 711(92.7) | 173(93.5) | 538(92.4) |       |
| Pulmonary air leak[n(%)] |           |           |           | 0.055 |
| Yes                      | 58(7.6)   | 20(10.8)  | 38(6.5)   |       |
| No                       | 709(92.4) | 165(89.2) | 544(93.5) |       |

Note: MHD, maternal hypertensive disorders; CA, Chorioamnionitis; PROM, premature rupture of membrane; GA, gestational age; BW, birth weight; SGA, small for gestational age; DRI, delivery room intubation; MV, mechanical ventilation; PDA, patent ductus arteriosus; RDS, respiratory distress syndrome; ROP, retinopathy of prematurity; IVH, intraventricular hemorrhage; NEC, necrotizing enterocolitis.

Table S7: A predictive scoring tool for BPD in preterm infants.

| BPD scoring tool  |                       |                                            |
|-------------------|-----------------------|--------------------------------------------|
| Risk factors      | Category              | Point                                      |
| CA                | No                    | 0                                          |
|                   | Yes                   | 5                                          |
| GA(weeks)         | $\geq 32$             | 0                                          |
|                   | 24 - 31 <sup>+6</sup> | $2 \times [32 - \text{GA}]$                |
|                   | $< 24$                | 18                                         |
| BW(g)             | $\geq 1500$           | 0                                          |
|                   | 500 - 1499            | $1 \times [15 - \text{BW}/100]$            |
|                   | $< 500$               | 11                                         |
| Sex               | female                | 0                                          |
|                   | male                  | 2                                          |
| SGA               | No                    | 0                                          |
|                   | Yes                   | 6                                          |
| 5 min Apgar score | $\geq 8$              | 0                                          |
|                   | 3 - 7                 | $1 \times (8 - 5 \text{ min Apgar score})$ |
|                   | $\leq 2$              | 6                                          |
| DRI               | No                    | 0                                          |
|                   | Yes                   | 4                                          |
| Surfactant        | No                    | 0                                          |
|                   | Yes                   | 5                                          |
| RDS               | No                    | 0                                          |
|                   | Yes                   | 7                                          |

Note: BPD, bronchopulmonary dysplasia; CA, Chorioamnionitis; GA, gestational age; BW, birth weight; SGA, small for gestational age; DRI, delivery room intubation; RDS, respiratory distress syndrome;

“[ ]” means ceiling function, for example, when BW=1450 g, then  $[15 - \text{BW}/100] = 1$ , the final BW gets 1 points.

**Table S8: The sensitivity, specificity and Youden index of different cutoff risk scores**

| <b>Cut-off value</b> | <b>Sensitivity</b> | <b>Specificity</b> | <b>Youden index</b> |
|----------------------|--------------------|--------------------|---------------------|
| 10.5                 | 0.995              | 0.256              | 0.251               |
| 11.5                 | 0.995              | 0.306              | 0.301               |
| 12.5                 | 0.995              | 0.342              | 0.337               |
| 13.5                 | 0.995              | 0.381              | 0.376               |
| 14.5                 | 0.973              | 0.443              | 0.416               |
| 15.5                 | 0.962              | 0.473              | 0.435               |
| 16.5                 | 0.951              | 0.526              | 0.477               |
| 17.5                 | 0.946              | 0.562              | 0.508               |
| 18.5                 | 0.935              | 0.603              | 0.538               |
| 19.5                 | 0.919              | 0.656              | 0.575               |
| 20.5                 | 0.908              | 0.704              | 0.612               |
| 21.5                 | 0.903              | 0.741              | 0.644               |
| 22.5                 | 0.897              | 0.765              | 0.662               |
| 23.5                 | 0.897              | 0.796              | 0.693               |
| 24.5                 | 0.897              | 0.837              | 0.734               |
| 25.5                 | 0.897              | 0.873              | 0.770*              |
| 26.5                 | 0.811              | 0.887              | 0.698               |
| 27.5                 | 0.703              | 0.904              | 0.607               |
| 28.5                 | 0.643              | 0.924              | 0.567               |
| 29.5                 | 0.546              | 0.936              | 0.482               |
| 30.5                 | 0.497              | 0.947              | 0.444               |
| 31.5                 | 0.449              | 0.95               | 0.399               |
| 32.5                 | 0.416              | 0.964              | 0.38                |
| 33.5                 | 0.384              | 0.974              | 0.358               |
| 34.5                 | 0.341              | 0.978              | 0.319               |
| 35.5                 | 0.303              | 0.978              | 0.281               |
| 36.5                 | 0.259              | 0.979              | 0.238               |
| 37.5                 | 0.232              | 0.983              | 0.215               |
| 38.5                 | 0.205              | 0.99               | 0.195               |
| 39.5                 | 0.205              | 0.995              | 0.2                 |
| 40.5                 | 0.173              | 0.995              | 0.168               |

Note: \*, Optimal cutoff point.

**Figure S1: CA**

**A**

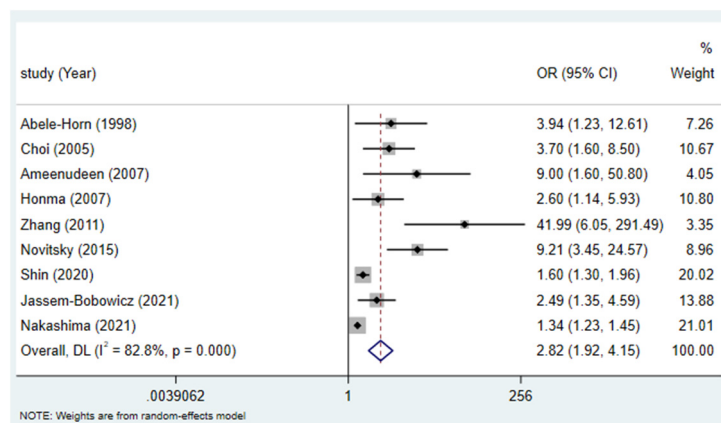

**B**

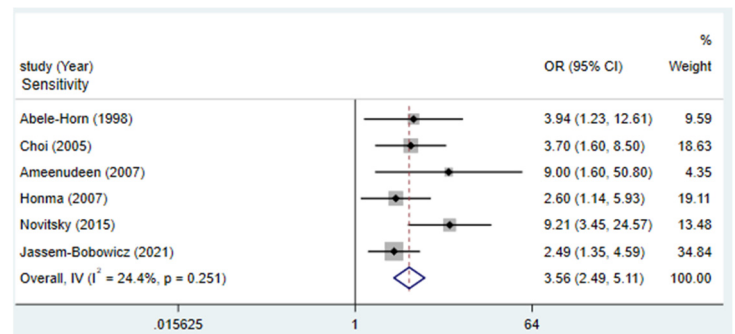

**Figure S1 - A. Forest plot: effect of CA on BPD in preterm infants;**  
**Figure S1 - B. Sensitivity analysis: effect of CA on BPD in preterm infants.**

**Figure S2: GA**

**A**

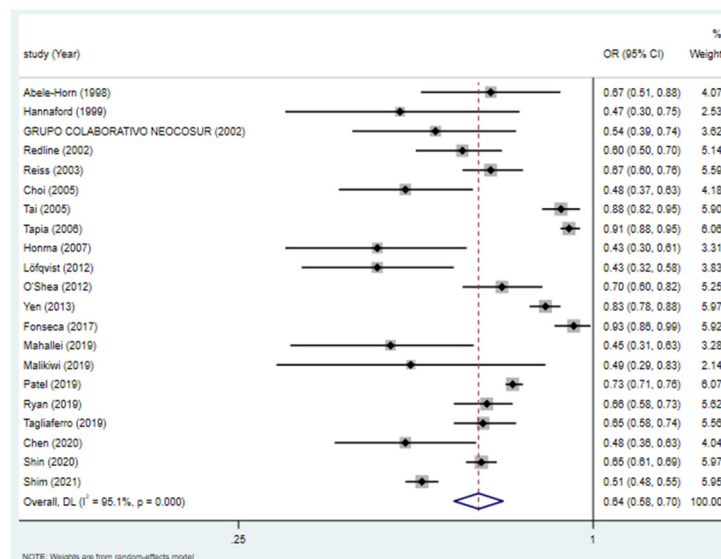

**B**

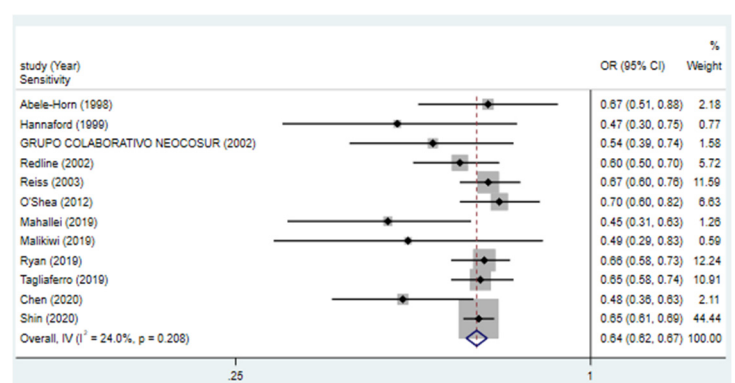

**Figure S2 - A. Forest plot: effect of GA on BPD in preterm infants;**  
**Figure S2 - B. Sensitivity analysis: effect of GA (per 1 week increase) on BPD in preterm infants.**



Figure S3: BW

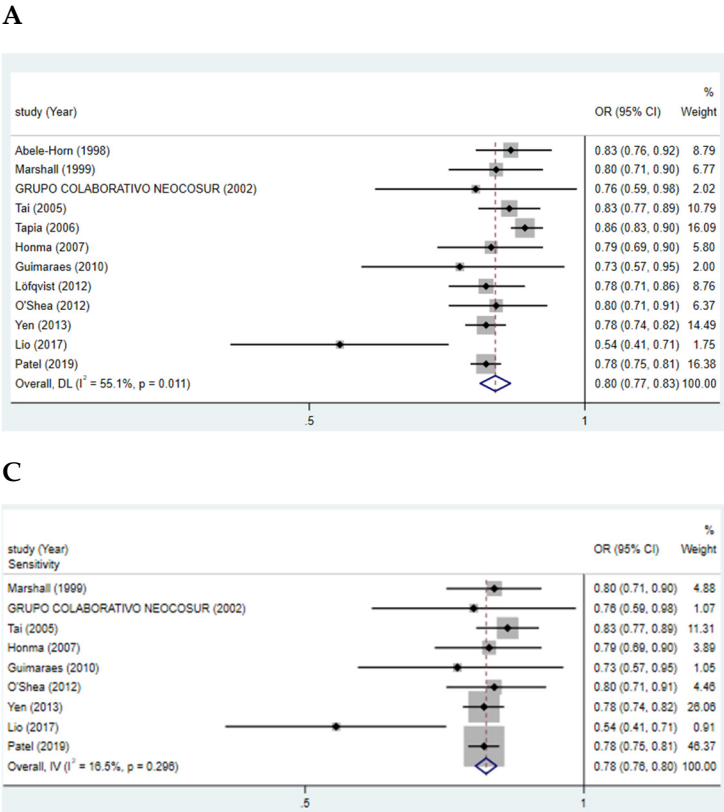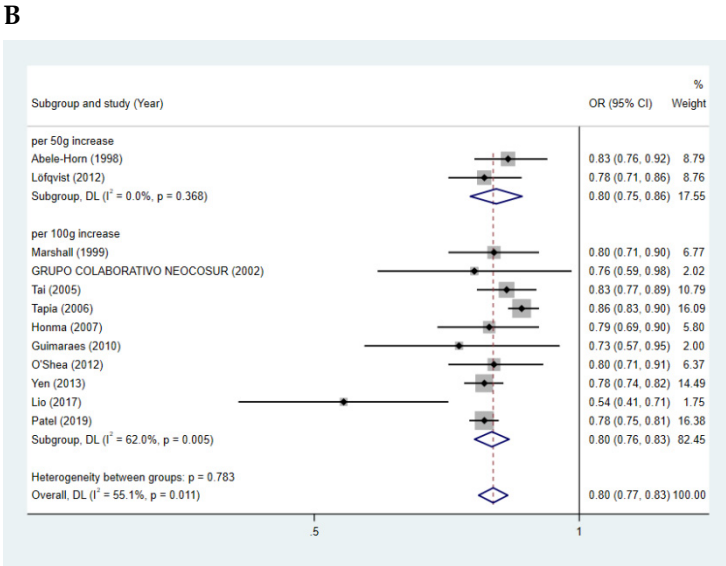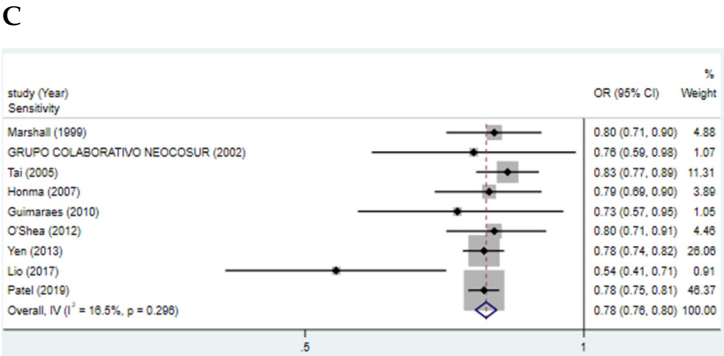

Figure S3 - A. Forest plot: effect of BW on BPD in preterm infants;

Figure S3 - B. Subgroup analysis: effect of BW on BPD in preterm infants;

Figure S3 - C. Sensitivity analysis: effect of BW (per 100 g increase) on BPD in preterm infants.

**Figure S4: Sex (male)**

**A**

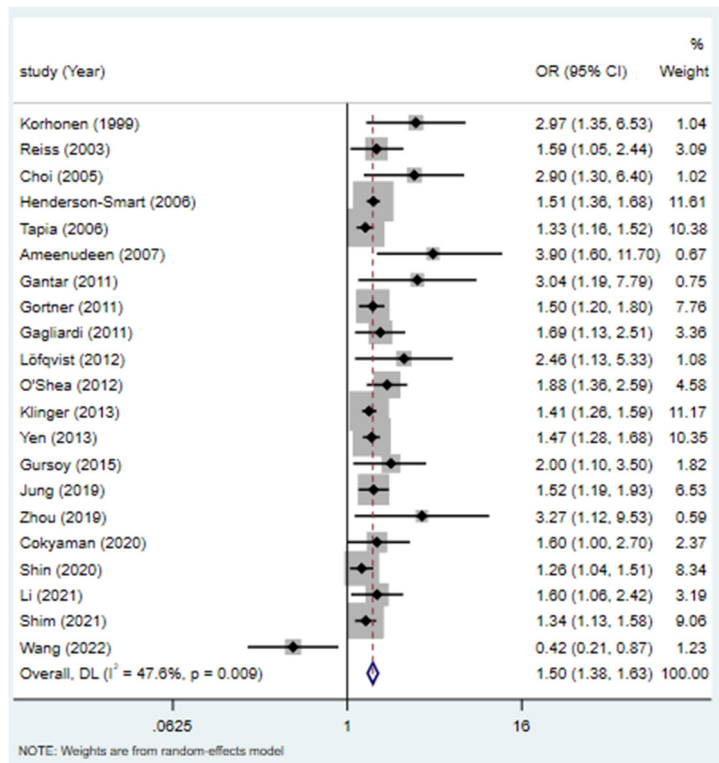

**B**

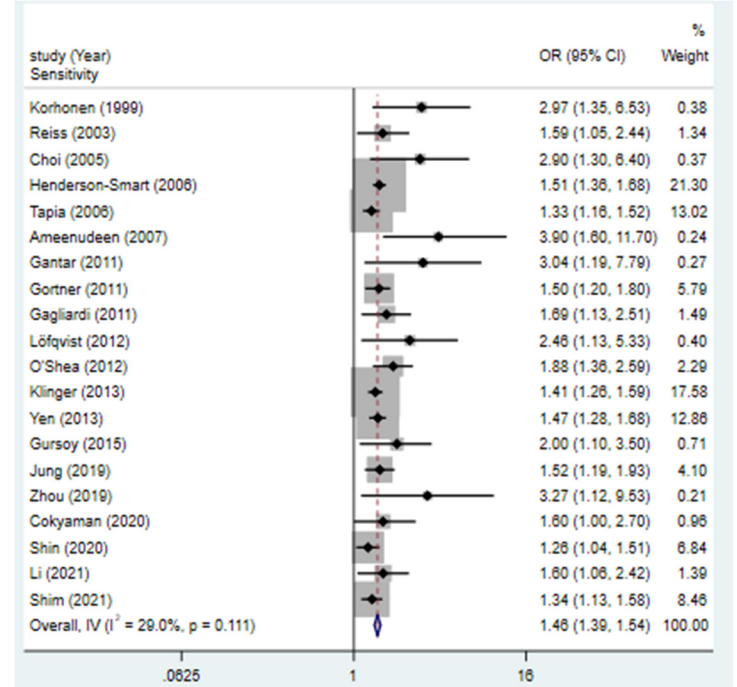

**Figure S4 - A. Forest plot: effect of sex on BPD in preterm infants;**  
**Figure S4 - B. Sensitivity analysis: effect of sex on BPD in preterm infants.**

**Figure S5: SGA**

**A**

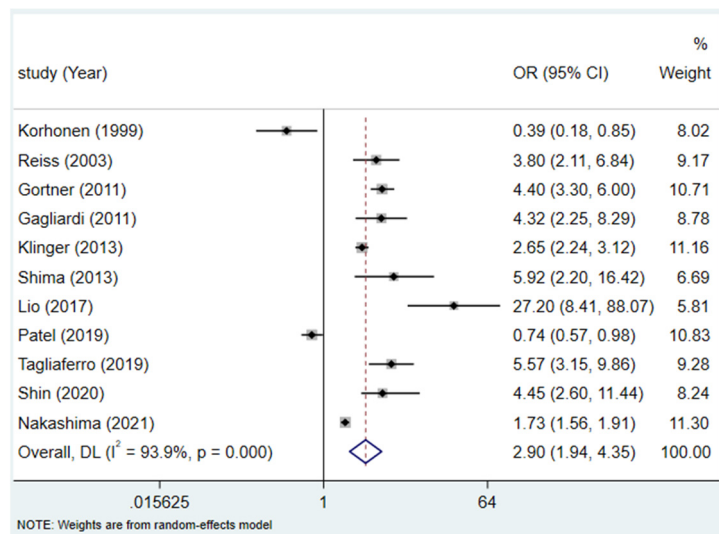

**B**

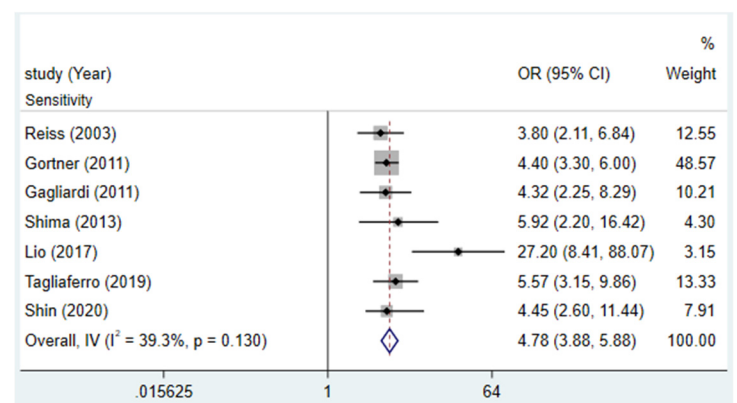

**Figure S5 - A. Forest plot: effect of SGA on BPD in preterm infants;**  
**Figure S5 - B. Sensitivity analysis: effect of SGA on BPD in preterm infants.**

**Figure S6: 5 min Apgar score**

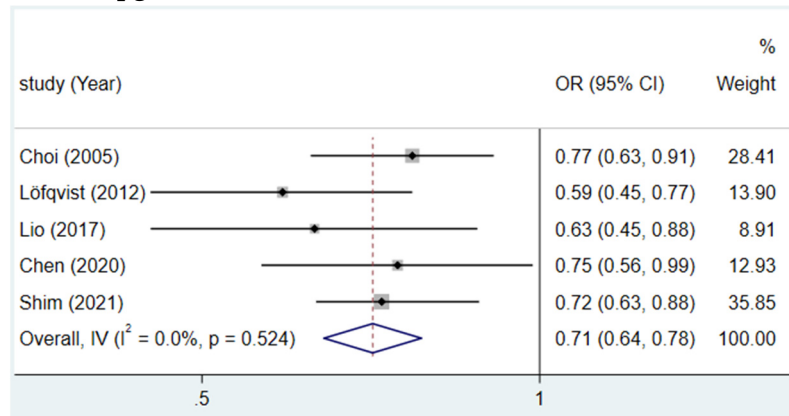

**Figure S6. Forest plot: effect of 5 min Apgar score (per 1 point increase) on BPD in preterm infants.**

**Figure S7: DRI**

**A**

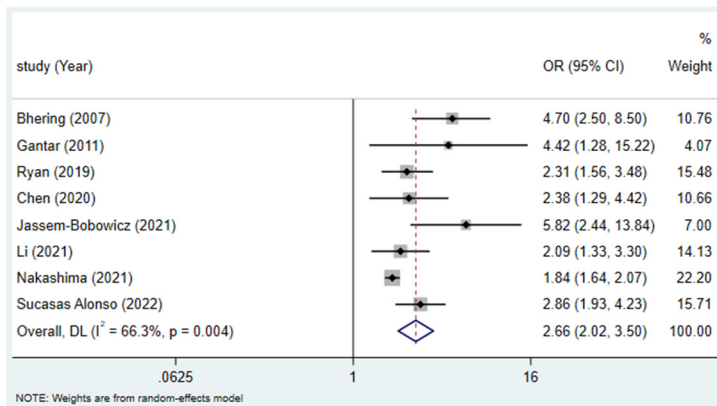

**B**

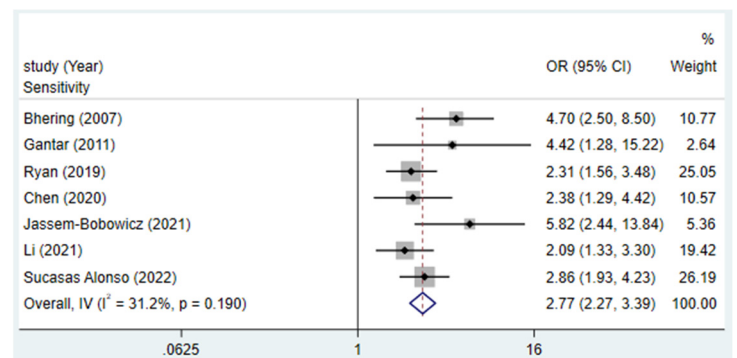

**Figure S7 - A. Forest plot: effect of DRI on BPD in preterm infants;**  
**Figure S7 - B. Sensitivity analysis: effect of DRI on BPD in preterm infants.**

**Figure S8: Surfactant**

**A**

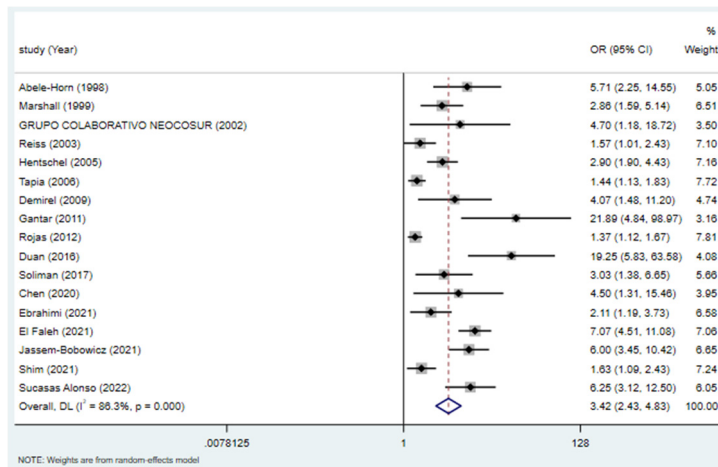

**B**

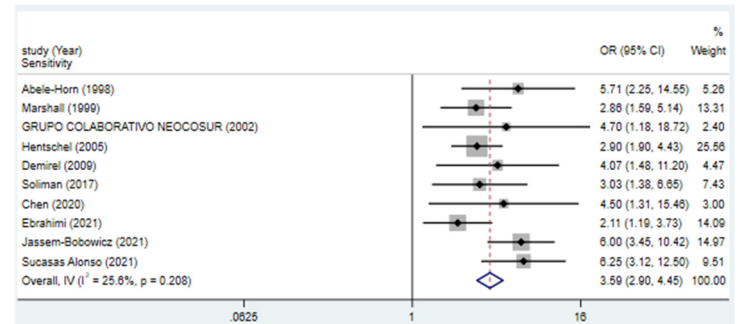

**Figure S8 - A. Forest plot: effect of Surfactant on BPD in preterm infants;**

**Figure S8 - B. Sensitivity analysis: effect of Surfactant on BPD in preterm infants.**

**Figure S9: RDS**

**A**

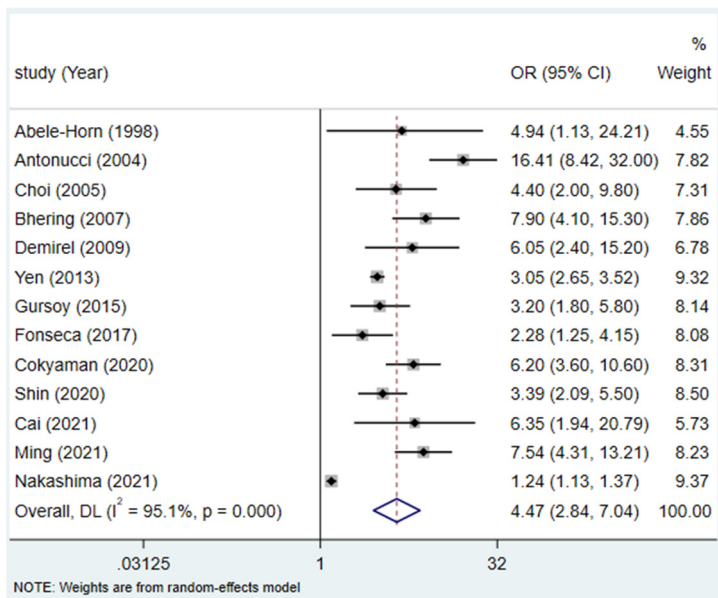

**B**

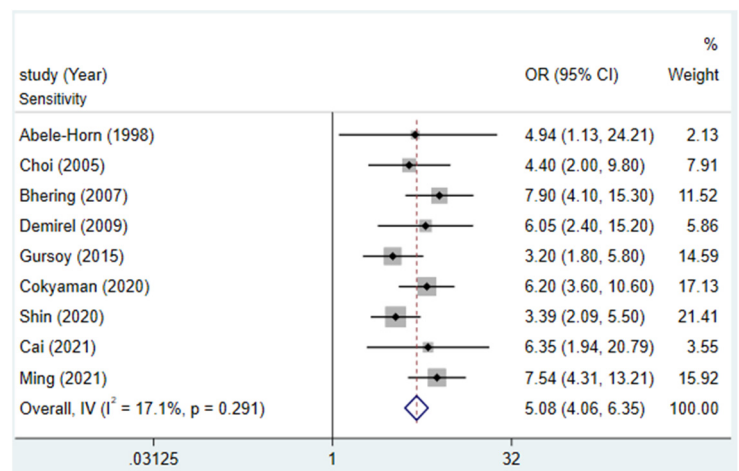

**Figure S9 - A. Forest plot: effect of RDS on BPD in preterm infants;**

**Figure S9 - B. Sensitivity analysis: effect of RDS on BPD in preterm infants.**

Note: BPD, bronchopulmonary dysplasia; CA, Chorioamnionitis; GA, gestational age; BW, birth weight; SGA, small for gestational age; DRI, delivery room intubation; RDS, respiratory distress syndrome.
